# Supplementary material
Source: HighWire-hosted journal article supplement (https://bmjopen.bmj.com/content/8/1/e015813)
Supplement: inline-supplementary-material-1 [file inline-supplementary-material-1.pdf]

# Appendix1

## PubMed search strategy

1. Orthoses
  2. Orthosis
  3. Orthotic
  4. Orthotic devices
  5. Brace
  6. Bracing
  7. Thoracolumbosacral Orthosis
  8. Thoracolumbosacral Orthoses
  9. “lumbosacral Orthoses”
  10. “lumbosacral Orthosis”
  11. “Thoracolumbar Orthosis”
  12. “Thoracolumbar Orthosis”
  13. Spinomed
  14. Posture Training Support
  15. Weighted Kypho-Orthosis
  16. Osteo-med
  17. Postural Taping
  - 18.1 OR 2 OR 3 OR 4 OR 5 OR 6 OR 7 OR 8 OR 9 OR 10 OR 11 OR 12 OR 13 OR 14 OR 15  
OR 16 OR 17
  19. kyphosis
  20. Kyphotic
  21. Hyperkyphosis
  22. Hyperkyphotic
  23. 18 OR 19 OR 20 OR 21 OR 22
  - 24.18 AND 23
- (Orthoses OR Orthosis OR Orthotic OR “Orthotic Devices” OR Brace OR Bracing OR  
“Thoracolumbosacral Orthosis” OR “Thoracolumbosacral Orthoses” OR “lumbosacral  
Orthoses” OR “lumbosacral Orthosis” OR “Thoracolumbar Orthosis” OR “Thoracolumbar  
Orthosis” OR Spinomed OR “Posture Training Support” OR “Weighted Kypho-Orthosis” OR

Osteo-med OR “Postural taping”) AND (Kyphosis OR Kyphotic OR Hyperkyphosis OR Hyperkyphotic)
